# Supplementary material for: In-Situ Modification of Nanofiltration Membranes Using Carbon Nanotubes for Water Treatment
Source: MDPI journal article supplement (doi:10.3390/membranes13070616), 2023-06-21
Supplement: s1 [file s1]

## Supplementary Material

# In-Situ modification of nanofiltration membranes using carbon nanotubes for water treatment

C. Vargas-Figueroa<sup>1</sup>, L. Pino-Soto<sup>\*1</sup>, A. Beratto-Ramos<sup>1</sup>, Y. Tapiero<sup>2</sup>, B. L. Rivas<sup>2</sup>, M.E. Berrio<sup>3</sup>,  
M.F. Meléndrez<sup>3</sup> and R. Borquez<sup>1\*</sup>.

<sup>1</sup>Departamento de Ingeniería Química, Facultad de Ingeniería, Universidad de Concepción, Edmundo Larenas 219. Concepción, 4070409, Chile

<sup>2</sup>Departamento de Polímeros, Facultad de Ciencias Químicas, Universidad de Concepción, Edmundo Larenas 129. Concepción, 4070371, Chile.

<sup>3</sup>Advanced Nanocomposites Research Group (GINA). Departamento de Ingeniería en Materiales (DI-MAT), Universidad de Concepción, Edmundo Larenas 315. Concepción 4070415, Chile.

\* Correspondence: luispino@udec.cl (L.P-S); rborquez@udec.cl (R.B.)

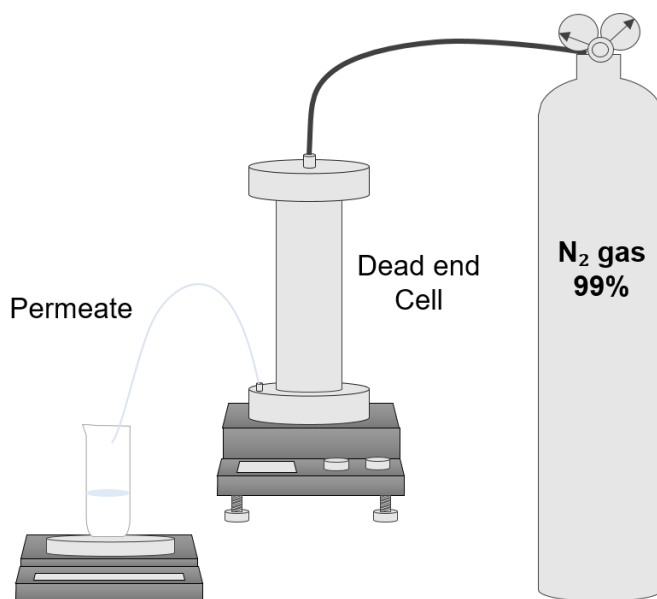

**Figure S1:** Filtration system used for modified membrane testing

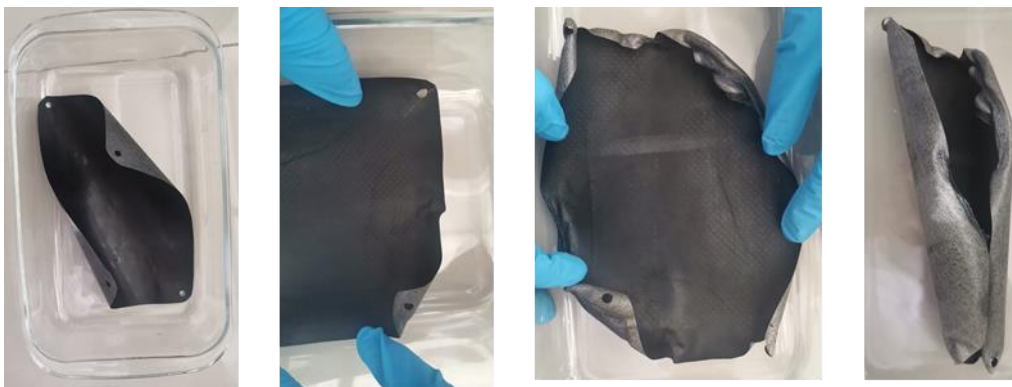

**Figure S2:** Images of membrane damage due to overpowering.

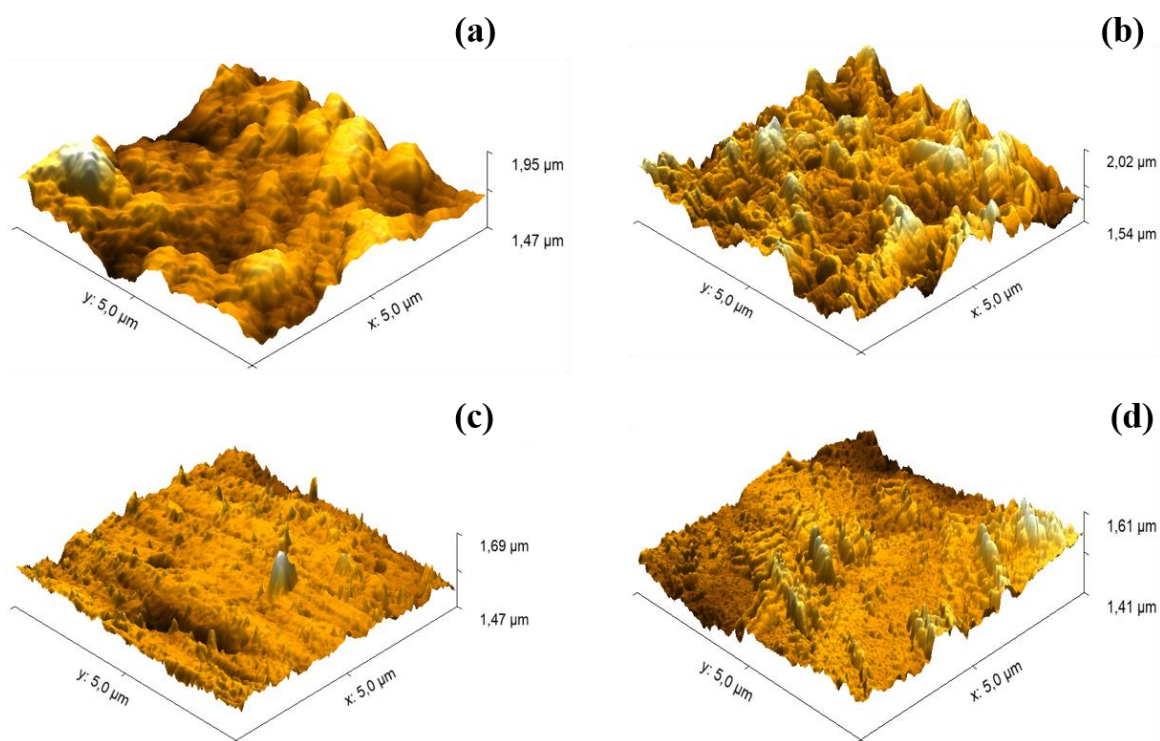

**Figure S3:** AFM images for (a) NF90, (b) NF270, (c) NF90-Ppy-CNTs and (d) NF270-Ppy-CNTs.

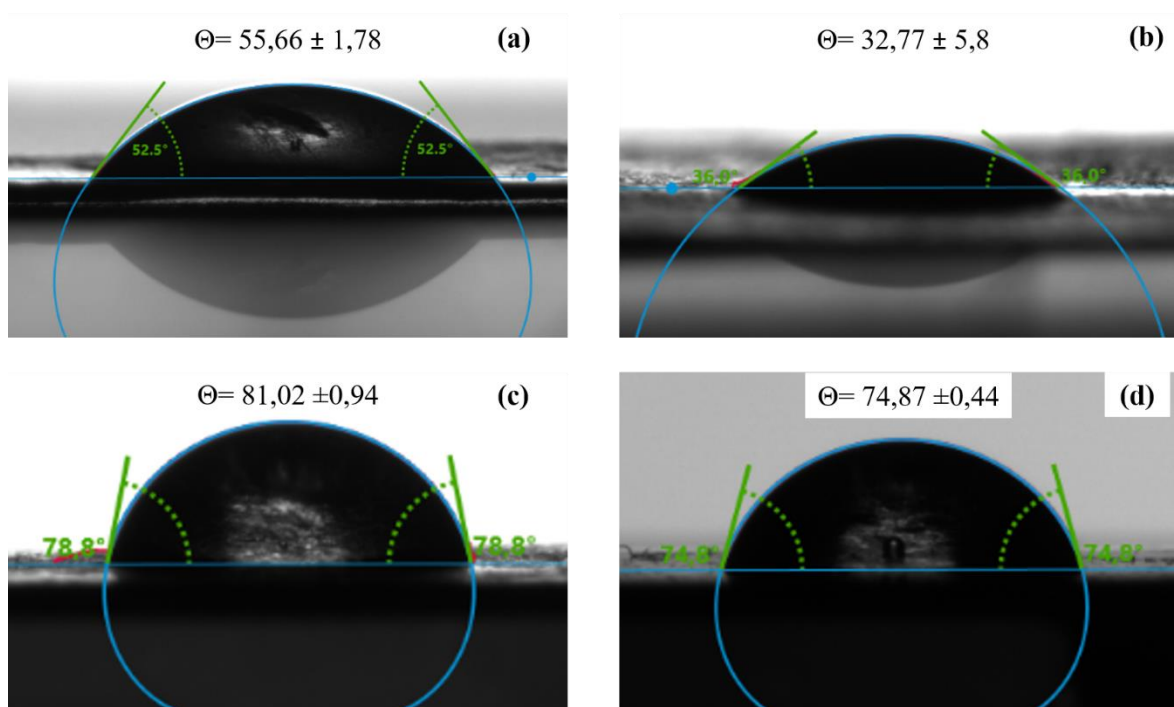

**Figure S4:** Contact angle images for (a) NF90, (b) NF270, (c) NF90-Ppy-CNTs and (d) NF270-Ppy-CNTs.
